# Supplementary material
Source: PubMed Central journal article supplement (PMC5777304)
Supplement: NIHMS914264-supplement-Fig_5_Permission.pdf [file NIHMS914264-supplement-Fig_5_Permission.pdf]

**ELSEVIER LICENSE  
TERMS AND CONDITIONS**

Oct 17, 2017

---

This Agreement between Hugh Calkins ("You") and Elsevier ("Elsevier") consists of your license details and the terms and conditions provided by Elsevier and Copyright Clearance Center.

|                                              |                                                                                                                                                                                                                                             |
|----------------------------------------------|---------------------------------------------------------------------------------------------------------------------------------------------------------------------------------------------------------------------------------------------|
| License Number                               | 4211461276043                                                                                                                                                                                                                               |
| License date                                 | Oct 17, 2017                                                                                                                                                                                                                                |
| Licensed Content Publisher                   | Elsevier                                                                                                                                                                                                                                    |
| Licensed Content Publication                 | Journal of the American College of Cardiology                                                                                                                                                                                               |
| Licensed Content Title                       | Incidence and Predictors of Implantable Cardioverter-Defibrillator Therapy in Patients With Arrhythmogenic Right Ventricular Dysplasia/Cardiomyopathy Undergoing Implantable Cardioverter-Defibrillator Implantation for Primary Prevention |
| Licensed Content Author                      | Aditya Bhonsale,Cynthia A. James,Crystal Tichnell,Brittney Murray,Dmitri Gagarin,Binu Philips,Darshan Dalal,Ryan Tedford,Stuart D. Russell,Theodore Abraham,Harikrishna Tandri,Daniel P. Judge,Hugh Calkins                                 |
| Licensed Content Date                        | Sep 27, 2011                                                                                                                                                                                                                                |
| Licensed Content Volume                      | 58                                                                                                                                                                                                                                          |
| Licensed Content Issue                       | 14                                                                                                                                                                                                                                          |
| Licensed Content Pages                       | 12                                                                                                                                                                                                                                          |
| Start Page                                   | 1485                                                                                                                                                                                                                                        |
| End Page                                     | 1496                                                                                                                                                                                                                                        |
| Type of Use                                  | reuse in a journal/magazine                                                                                                                                                                                                                 |
| Requestor type                               | non-commercial company (non-profit)                                                                                                                                                                                                         |
| Portion                                      | figures/tables/illustrations                                                                                                                                                                                                                |
| Number of figures/tables/illustrations       | 1                                                                                                                                                                                                                                           |
| Format                                       | both print and electronic                                                                                                                                                                                                                   |
| Are you the author of this Elsevier article? | Yes                                                                                                                                                                                                                                         |
| Will you be translating?                     | Yes, including English rights                                                                                                                                                                                                               |
| Number of languages                          | 1                                                                                                                                                                                                                                           |
| Languages                                    | english                                                                                                                                                                                                                                     |
| Original figure numbers                      | Figure 1, 2, 3, 4,5                                                                                                                                                                                                                         |
| Title of the article                         | Risk Stratification in Arrhythmogenic Right Ventricular                                                                                                                                                                                     |

## Cardiomyopathy (ARVD)

Publication new article is in Circulation  
Publisher of the new article Elsevier  
Author of new article Calkins H, Corrado D, Marcus F  
Expected publication date Nov 2017  
Estimated size of new article 29  
(number of pages)  
Requestor Location Hugh Calkins  
1800 Orleans St  
Sheikh Zayed Tower #7125  
BALTIMORE, MD 21287  
United States  
Attn: Hugh Calkins  
Publisher Tax ID 98-0397604  
Total 0.00 USD

## Terms and Conditions

**INTRODUCTION**

1. The publisher for this copyrighted material is Elsevier. By clicking "accept" in connection with completing this licensing transaction, you agree that the following terms and conditions apply to this transaction (along with the Billing and Payment terms and conditions established by Copyright Clearance Center, Inc. ("CCC"), at the time that you opened your Rightslink account and that are available at any time at <http://myaccount.copyright.com>).

**GENERAL TERMS**

2. Elsevier hereby grants you permission to reproduce the aforementioned material subject to the terms and conditions indicated.

3. Acknowledgement: If any part of the material to be used (for example, figures) has appeared in our publication with credit or acknowledgement to another source, permission must also be sought from that source. If such permission is not obtained then that material may not be included in your publication/copies. Suitable acknowledgement to the source must be made, either as a footnote or in a reference list at the end of your publication, as follows:

"Reprinted from Publication title, Vol /edition number, Author(s), Title of article / title of chapter, Pages No., Copyright (Year), with permission from Elsevier [OR APPLICABLE SOCIETY COPYRIGHT OWNER]." Also Lancet special credit - "Reprinted from The Lancet, Vol. number, Author(s), Title of article, Pages No., Copyright (Year), with permission from Elsevier."

4. Reproduction of this material is confined to the purpose and/or media for which permission is hereby given.

5. Altering/Modifying Material: Not Permitted. However figures and illustrations may be altered/adapted minimally to serve your work. Any other abbreviations, additions, deletions and/or any other alterations shall be made only with prior written authorization of Elsevier Ltd. (Please contact Elsevier at [permissions@elsevier.com](mailto:permissions@elsevier.com)). No modifications can be made to any Lancet figures/tables and they must be reproduced in full.
